# Supplementary material
Source: publisher site journal article supplement (https://www.dovepress.com/article/551576)
Supplement: Supplementary file 1 [file 551576%20Supplementary%20Material.docx]

**Supplement 1. Definition of SOAP**

SOAP Documentation Method:

Documentation should provide comprehensive, narrative descriptions of problem changes, based on subjective and objective information for each identified problem. Each problem should be documented using the SOAP format according to its assigned number. We assigned #0 for temporary problems, while a formal care plan was developed for problems persisting beyond 24 h using its designated number.

SOAP Components:

S (subjective data): Subjective information consisting of the patient’s physical and mental complaints, intentional information obtained from the patient, and information obtained from family members or during consultations should be documented clearly.

O (objective data): Objective information that focuses on the problem, documenting observed facts, interview results, measurements, and examination findings. (Vital sign charts may also be referenced.) When information can be obtained from nursing care plans, we intentionally observe the planned content and selectively document the results in a concise manner.

A (assessment): Evaluation of a patient’s problem that integrates subjective and objective information. Information should document how the patient’s condition is changing, including whether it is improving, unchanged, or worsening.

P (plan): The plan should describe the actions that should be taken, explain how to respond to the problem’s causes, and induce factors for its resolution. Plans differ between initial planning and progress-documentation planning.

E (evaluation): Document evaluation.

I (Intervention): Document the specific content of implemented interventions and care

Note: This supplement is an excerpt from the “Nursing Record Guidelines” published by Oda Hospital, translated into English.
